# Supplementary material for: A de novo bioinspired pH-sensitive magnetic hydrogel based on chitosan for synergistic chemo/hyperthermia treatment of MCF-7 breast cancer cells
Source: Research Square preprint supplement (doi:10.21203/rs.3.rs-7884113/v1), 2025-10-30
Supplement: Supplementary file 1 [file b9731cef0f635e007f135b2d.docx]

**A *de novo* bioinspired pH-sensitive magnetic hydrogel based on chitosan for synergistic chemo/hyperthermia therapy of MCF-7 breast cancer cells**

Fatemeh Ghobadi1, Franak Aghaz2, Soheila Zare3,Mehdi Jaymand[[1]](#footnote-1)*,2, and Hossein Derakhshankhah4,*

1. Students Research Committee, Kermanshah University of Medical Sciences, Kermanshah, Iran
2. Nano Drug Delivery Research Center, Health Technology Institute, Kermanshah University of Medical Sciences, Kermanshah, Iran
3. Medicinal Biology Research Center, Health Technology Institute, Kermanshah University of Medical Sciences, Kermanshah, Iran
4. Pharmaceutical Sciences Research Center, Health Institute, Kermanshah University of Medical Sciences, Kermanshah, Iran


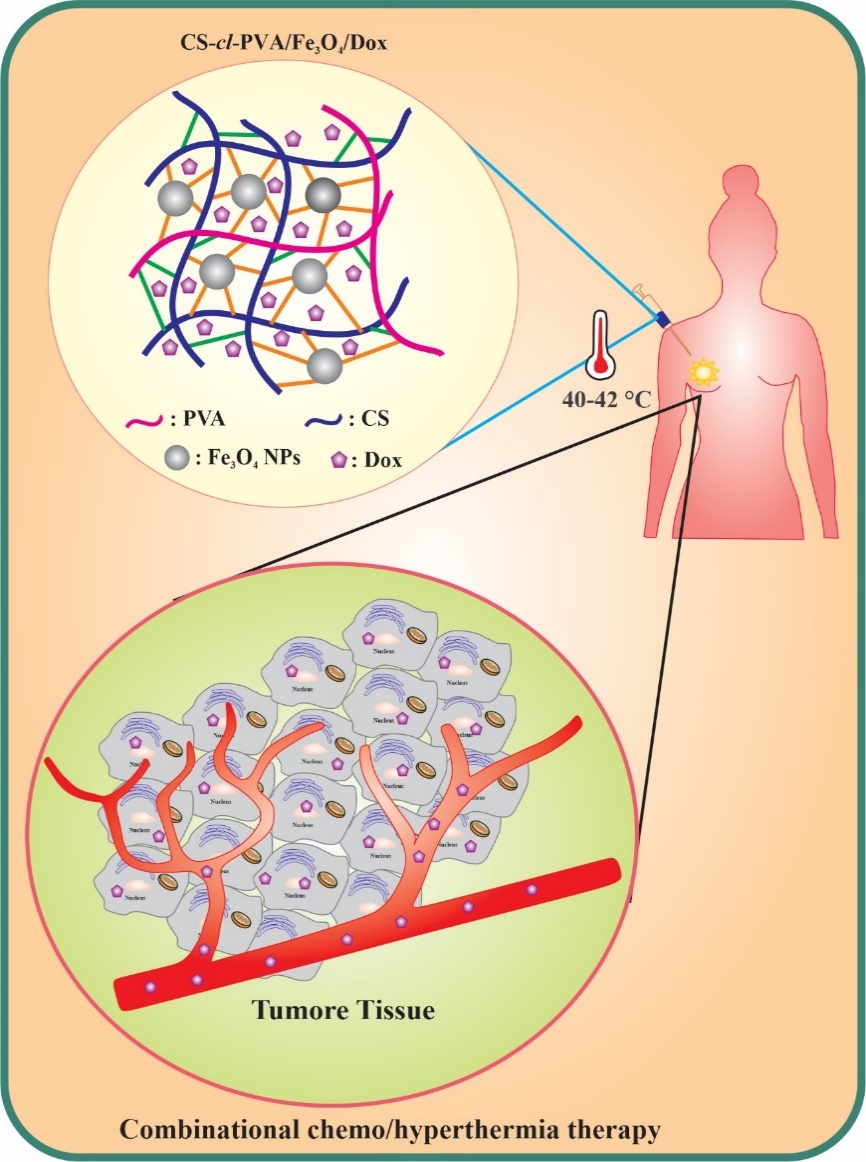


A *de novo* bioinspired pH-sensitive magnetic hydrogel was designed and developed based on chitosan (CS) and poly (vinyl alcohol) (PVA) for synergistic chemo/hyperthermia therapy of MCF-7 breast cancer cells.

1. * Correspondence to: Mehdi Jaymand ([m_jaymand@yahoo.com](mailto:m_jaymand@yahoo.com); [m.jaymand@gmail.com](mailto:m.jaymand@gmail.com); [mehdi.jaymand@kums.ac.ir](mailto:mehdi.jaymand@kums.ac.ir)) or Hossein Derakhshankhah (derakhshankhah.hossein@gmail.com) [↑](#footnote-ref-1)
